# Supplementary material for: Tadr is an axonal histidine transporter required for visual neurotransmission in Drosophila
Source: eLife journal article supplement (doi:10.7554/elife.75821), 2022-03-01
Supplement: supp [file elife-75821-supp-v1.zip]

Archive with 17 entries (17 files):
- elife_poa_e75821_Transparent_Reporting_File.pdf
- elife_poa_e75821_Figure_2_source_data_1.xlsx
- elife_poa_e75821_Figure_2_figure_supplement_2_source_data_1.pdf
- elife_poa_e75821_Figure_2_figure_supplement_3_source_data_1.xlsx
- elife_poa_e75821_Figure_3_source_data_1.xlsx
- elife_poa_e75821_Figure_3_figure_supplement_1_source_data_1.xlsx
- elife_poa_e75821_Figure_4_figure_supplement_1_source_data_1.pdf
- elife_poa_e75821_Figure_5_source_data_1.xlsx
- elife_poa_e75821_Figure_6_source_data_1.xlsx
- elife_poa_e75821_Figure_6_figure_supplement_1_source_data_1.xlsx
- elife_poa_e75821_Figure_1_figure_supplement_1.pdf
- elife_poa_e75821_Figure_2_figure_supplement_1.pdf
- elife_poa_e75821_Figure_2_figure_supplement_2.pdf
- elife_poa_e75821_Figure_2_figure_supplement_3.pdf
- elife_poa_e75821_Figure_3_figure_supplement_1.pdf
- elife_poa_e75821_Figure_4_figure_supplement_1.pdf
- elife_poa_e75821_Figure_6_figure_supplement_1.pdf
