# Supplementary material for: Tadr is an axonal histidine transporter required for visual neurotransmission in Drosophila
Source: eLife journal article supplement (doi:10.7554/elife.75821), 2022-03-01
Supplement: supp [file elife-75821-supp-v1.zip › elife_poa_e75821_Figure_2_figure_supplement_3_source_data_1.xlsx]

## Sheet: Figure 2-figure supplement  2B
Figure 2-figure supplement 2 source data 1
Title: source data for quantification of average number of rhabdomeres per ommatidium at indicated days of wild type (w1118), tadr2, and culd1.
Days	w1118						tadr2						culd1
1	7	7	7	7	7	7	7	7	7	7	7	7	7	7	7	7
5	7	7	7	7	7	7	7	7	7	7	7	7	6	7	6	7
10	7	7	7	7	7	7	7	6	7	7	7	7	6	5	5	5

## Sheet: Figure 2-figure supplement  2DE
Figure 2-figure supplement 2 source data 1
Title: source data for quantification of capitate projection and synaptic vesicle density in tadr2 mutants
Capitate projections/cartridge			Vesicle density (%)
w1118	tadr2		w1118	tadr2
4	3		90	97
4	4		100	97
5	5		93	102
5	3		86	84
5	6		96	92
			98	95
