# Supplementary material for: Tadr is an axonal histidine transporter required for visual neurotransmission in Drosophila
Source: eLife journal article supplement (doi:10.7554/elife.75821), 2022-03-01
Supplement: supp [file elife-75821-supp-v1.zip › elife_poa_e75821_Figure_2_source_data_1.xlsx]

## Sheet: Figure 2B source data
Figure 2-source data 1
Title: source data for quantitative of ERG transients
ERG
genotype	mV
GMR>GFPRNAi	3.845
	3.725
	3.885
	3.332
	2.589
GMR>tadrRNAi1	0.022
	0.021
	0.058
	0.16
	0.042
GMR>tadrRNAi2	0.012
	0.078
	0.064
	0.168
	0.153

## Sheet: Figure 2D source data
Figure 2-source data 1
Title: source data for quantitative of ERG transients
ERG
genotype	mV
repo>GFPRNAi	5.25
	5.57
	5.023
	5.343
	5.773
repo>tadrRNAi1	5.84
	5.82
	5.402
	5.285
	5.232
repo>tadrRNAi2	5.88
	5.57
	5.023
	5.083
	5.117

## Sheet: Figure 2F source data
Figure 2-source data 1
Title: source data for quantitative of ERG transients
ERG
genotype	mV
w1118	5.452
	4.88
	5.445
	5.66
	5.354
tadr2	0.628
	0.107
	0.534
	0.08
	0.51
tadr2;trp-GFP	0.104
	0.803
	0.055
	0.07
	0.94
tadr2;trp-tadr	5.725
	5.634
	5.061
	5.226
	5.883

## Sheet: Figure 2G source data
Figure 2-source data 1
Title: source data for phototaxis behaviors
phototaxis
genotype	Percentage of phototactic (%)
GMR>GFPRNAi	78	85	74	80	82
GMR>tadrRNAi1	62	50	35	42	45
GMR>tadrRNAi2	41	35	36	25	60
repo>GFPRNAi	85	90	83	78	75
repo>tadrRNAi1	90	80	75	85	88
repo>tadrRNAi2	85	78	95	83	72

## Sheet: Figure 2H source data
Figure 2-source data 1
Title: source data for phototaxis behaviors
phototaxis
genotype	Percentage of phototactic (%)
w1118	86	85	78	76	90
tadr2	40	30	30	25	35
tadr2;trp-GFP	60	50	35	50	45
tadr2;trp-tadr	85	90	87	79	88
