# Supplementary material for: Tadr is an axonal histidine transporter required for visual neurotransmission in Drosophila
Source: eLife journal article supplement (doi:10.7554/elife.75821), 2022-03-01
Supplement: supp [file elife-75821-supp-v1.zip › elife_poa_e75821_Figure_3_figure_supplement_1_source_data_1.xlsx]

## Sheet: Figure 3-figure supplement  1A
Figure 3-figure supplement 1 source data 1
Title: source data for competition assays using histidine in combination with different L-amino acid
	protein levels (mg)	CPM	CPM/mg	Bq/mg
MOCK	0.0267757	66	2464.92	41.082
	0.0253309	66	2605.52	43.4253
	0.0250682	84	3350.86	55.8477
RFP	0.0256592	84	3273.68	54.5613
	0.0243457	62	2546.65	42.4441
	0.0207993	64	3077.02	51.2837
SLC38A3	0.0233606	316	13527	225.451
	0.0211934	301	14202.6	236.709
	0.0250025	278	11118.9	185.315
TADR	0.0277608	310	11166.8	186.114
	0.020668	296	14321.7	238.695
	0.02671	280	10483	174.716
TADR+histidine	0.0196172	70	3568.3	59.4717
	0.0258563	48	1856.42	30.9403
	0.0265787	62	2332.7	38.8783
TADR+serine	0.0242144	244	10076.7	167.944
	0.0256592	280	10912.3	181.871
	0.0206023	282	13687.8	228.13
TADR+alanine	0.0254622	260	10211.2	170.187
	0.0252652	300	11874	197.901
	0.0311102	296	9514.56	158.576
TADR+cysteine	0.0251338	292	11617.8	193.63
	0.0227695	266	11682.3	194.704
	0.0309132	296	9575.2	159.587
TADR+glutamine	0.0246084	290	11784.6	196.41
	0.0250025	284	11358.9	189.315
	0.0258563	303	11718.6	195.311
TADR+asparagine	0.023886	278	11638.6	193.977
	0.024083	285	11834.1	197.234
	0.0273011	276	10109.5	168.491
TADR+lysine	0.0254622	144	5655.44	94.2574
	0.024083	140	5813.22	96.887
	0.0235576	162	6876.75	114.612
TADR+aginine	0.0246741	308	12482.7	208.045
	0.0227695	290	12736.3	212.272
	0.0246741	276	11185.8	186.43

## Sheet: Figure 3-figure supplement  1B
Figure 3-figure supplement 1 source data 1
Title: source data for competition assays using histidine in combination with carcinine
	protein levels (mg)	CPM	CPM/mg	Bq/mg
RFP	0.0462251	195	4218.49	70.3081
	0.0450822	174	3859.61	64.3269
	0.0452727	160	3534.14	58.9023
SLC38A3	0.0435584	543	12466	207.767
	0.0427965	537	12547.8	209.129
	0.0420346	487	11585.7	193.095
TADR	0.0460346	647	14054.6	234.244
	0.0454632	533	11723.8	195.396
	0.0414631	693	16713.6	278.561
TADR+carcinine	0.0441298	699	15839.6	263.994
	0.042606	556	13049.8	217.497
	0.0437489	588	13440.3	224.006
