# Supplementary material for: Tadr is an axonal histidine transporter required for visual neurotransmission in Drosophila
Source: eLife journal article supplement (doi:10.7554/elife.75821), 2022-03-01
Supplement: supp [file elife-75821-supp-v1.zip › elife_poa_e75821_Figure_3_source_data_1.xlsx]

## Sheet: Figure 3B source data
Figure 3-source data 1
Title: source data for histidine uptake assay
	Bq/mg
RFP	36.0692
	57.9764
	65.0738
SLC38A3	157.376
	176.281
	190.073
TADR	177.48
	160.027
	183.637

## Sheet: Figure 3C source data
Figure 3-source data 1
Title: source data for histamine uptake assay
	Bq/mg
RFP	11.7857
	10.2703
	12.5664
OCT2	41.0553
	46.7148
	48.3103
TADR	13.2997
	16.5797
	14.7455

## Sheet: Figure 3D source data
Figure 3-source data 1
Title: source data for β-alanine uptake assay
	Bq/mg
RFP	37.2655
	38.2797
	44.3344
BalaT	241.698
	232.228
	158.067
TADR	39.5966
	28.0898
	33.3599
