# Supplementary material for: Tadr is an axonal histidine transporter required for visual neurotransmission in Drosophila
Source: eLife journal article supplement (doi:10.7554/elife.75821), 2022-03-01
Supplement: supp [file elife-75821-supp-v1.zip › elife_poa_e75821_Figure_5_source_data_1.xlsx]

## Sheet: Figure 5C source data
Figure 5-source data 1
Title: source data for quantitative of average intensity fold change (Lamina/Retinal)
w1118	tadr2
5.56	1.45
5.37	1.29
4.86	1.72
4.66	1.49

## Sheet: Figure 5D-5F source data
Figure 2-source data 1
Title: source data for LC-MS
The levels of histamine in w1118, HdcP217, tadr2, and tadr2;trp-tadr mutant fly compound eyes
w1118	HdcP217	tadr2	tadr2;trp-tadr
0.259441	0.0217075	0.0622398	0.152915
0.212371	0.0193098	0.0519619	0.157797
0.244085	0.0184313	0.062553	0.143035
0.262727	0.0182111	0.064545	0.244346
The levels of β-alanine in w1118, HdcP217, tadr2, and tadr2;trp-tadr mutant fly compound eyes
w1118	HdcP217	tadr2	tadr2;trp-tadr
0.891605	0.420275	0.674146	0.779435
0.904054	0.461148	0.670798	0.877172
0.847402	0.40209	0.732748	0.896748
0.89244	0.453312	0.726785	0.903127
The levels of carcinine in w1118, HdcP217, tadr2, and tadr2;trp-tadr mutant fly compound eyes
w1118	HdcP217	tadr2	tadr2;trp-tadr
0.178641	0.070473	0.129738	0.178517
0.19147	0.0605479	0.132016	0.182249
0.192424	0.0554965	0.147901	0.165951
0.19922	0.0543292	0.150456	0.188806
