# Supplementary material for: Tadr is an axonal histidine transporter required for visual neurotransmission in Drosophila
Source: eLife journal article supplement (doi:10.7554/elife.75821), 2022-03-01
Supplement: supp [file elife-75821-supp-v1.zip › elife_poa_e75821_Figure_6_figure_supplement_1_source_data_1.xlsx]

## Sheet: Sheet1
Figure 6-figure supplement 1 source data 1
Title: source data for histamine uptake assay
	protein levels (mg)	CPM	CPM/mg	Bq/mg
RFP	0.332622	279	838.79	13.9798
	0.389652	294	754.52	12.5753
	0.355423	312	877.828	14.6305
OCT2	0.325022	876	2695.2	44.92
	0.326679	815	2494.8	41.58
	0.31125	851	2734.13	45.5689
CG13248	0.180048	210	1166.36	19.4393
	0.225477	171	758.392	12.6399
	0.225591	183	811.201	13.52
Slif	0.197134	258	1308.76	21.8126
	0.281821	227	805.476	13.4246
	0.259592	276	1063.21	17.7201
