# Supplementary material for: Tadr is an axonal histidine transporter required for visual neurotransmission in Drosophila
Source: eLife journal article supplement (doi:10.7554/elife.75821), 2022-03-01
Supplement: supp [file elife-75821-supp-v1.zip › elife_poa_e75821_Figure_6_source_data_1.xlsx]

## Sheet: Figure 6A source data
Figure 6-source data 1
Title: source data for histidine uptake assay
	Bq/mg
Mock	37.2441
	27.4378
	33.0262
RFP	31.5641
	26.4399
	30.2055
SLC38A3	197.48
	200.027
	183.637
TADR	190.54
	188.994
	200.171
CG13248	193.212
	170.639
	172.471
Slif	23.5747
	29.3841
	30.798

## Sheet: Figure 6C source data
Figure 6-source data 1
Title: source data for quantitative of ERG transients
ERG
genotype	mV
control	4.456
	4.61
	4.722
	5.415
	5.196
tadr2	0.079
	0.043
	0.031
	0.094
	0.106
tadr2 +SLC38A3	5.35
	5.032
	4.872
	4.727
	3.993
tadr2 +TADR	4.2235
	4.73
	3.988
	4.237
	5.007
tadr2 +CG13248	3.85
	3.425
	3.322
	3.775
	2.988
tadr2 +Slif	0.042
	0.059
	0.021
	0.096
	0.127

## Sheet: Figure 6D source data
Figure 6-source data 1
Title: source data for phototaxis behaviors
phototaxis
genotype	Percentage of phototactic (%)
control	95	95	80	95	90
tadr2	40	30	30	25	35
tadr2 +SLC38A3	80	90	85	60	70
tadr2 +TADR	85	80	75	70	85
tadr2 +CG13248	70	75	80	85	85
tadr2 +Slif	30	50	25	40	40
