# Supplementary material for: Tadr is an axonal histidine transporter required for visual neurotransmission in Drosophila
Source: eLife journal article supplement (doi:10.7554/elife.75821), 2022-03-01

Figure 2-figure supplement 2 source data 1

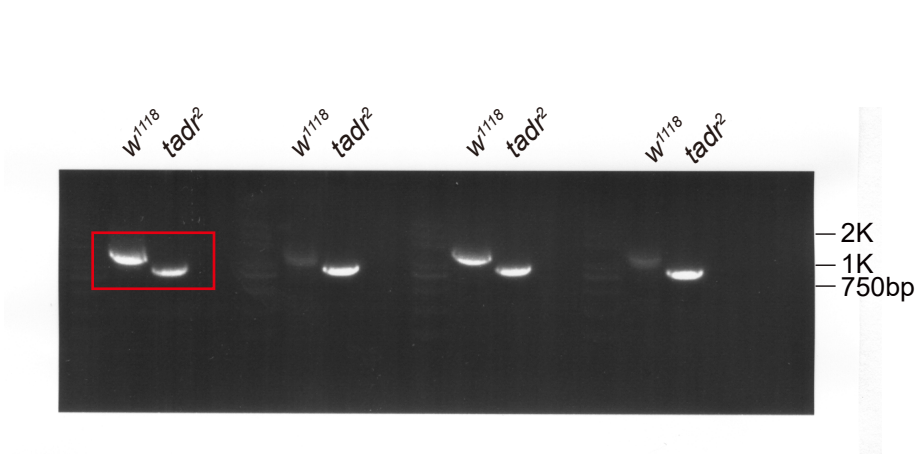

Supplement: supp [file elife_poa_e75821_Figure_2_figure_supplement_2_source_data_1.pdf › elife_poa_e75821_Figure_2_figure_supplement_2_source_data_1.pdf]
