# Supplementary material for: Tadr is an axonal histidine transporter required for visual neurotransmission in Drosophila
Source: eLife journal article supplement (doi:10.7554/elife.75821), 2022-03-01

Figure 4-figure supplement 1 source data 1

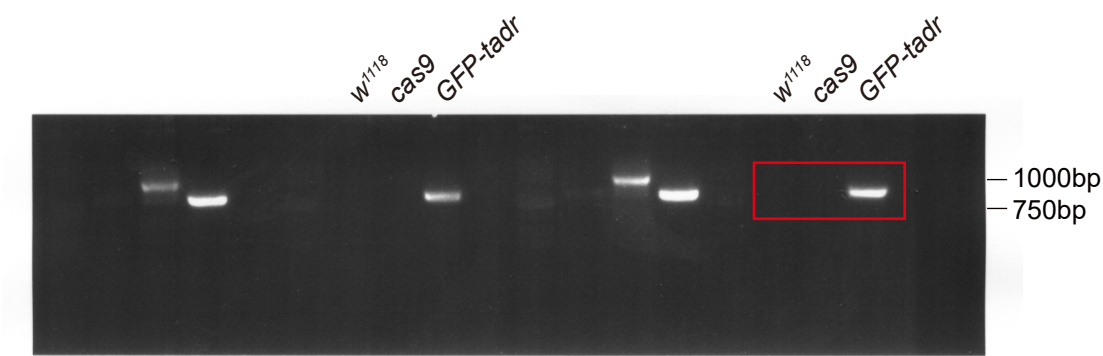

Supplement: supp [file elife_poa_e75821_Figure_4_figure_supplement_1_source_data_1.pdf › elife_poa_e75821_Figure_4_figure_supplement_1_source_data_1.pdf]
