# Supplementary figures and images for: Tadr is an axonal histidine transporter required for visual neurotransmission in Drosophila
Source: eLife journal article supplement (doi:10.7554/elife.75821), 2022-03-01

Figure 2-figure supplement 2 source data 1

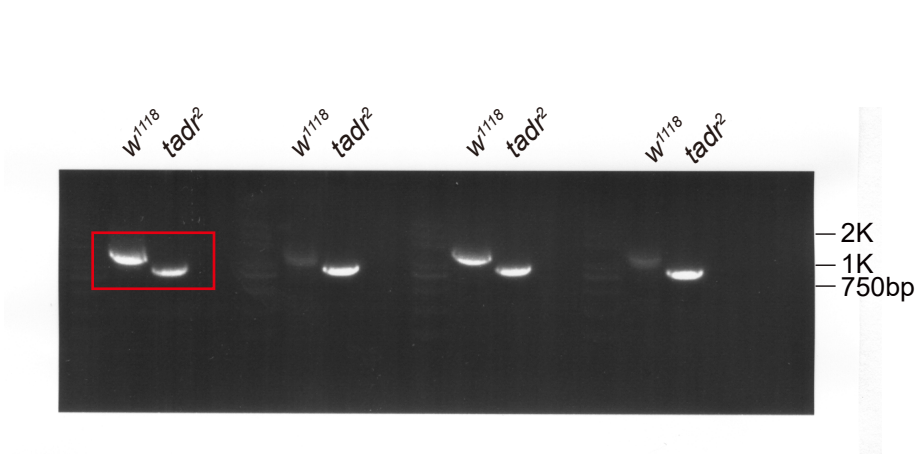

Supplement: supp [file elife-75821-supp-v1.zip › elife_poa_e75821_Figure_2_figure_supplement_2_source_data_1.pdf]

Figure 4-figure supplement 1 source data 1

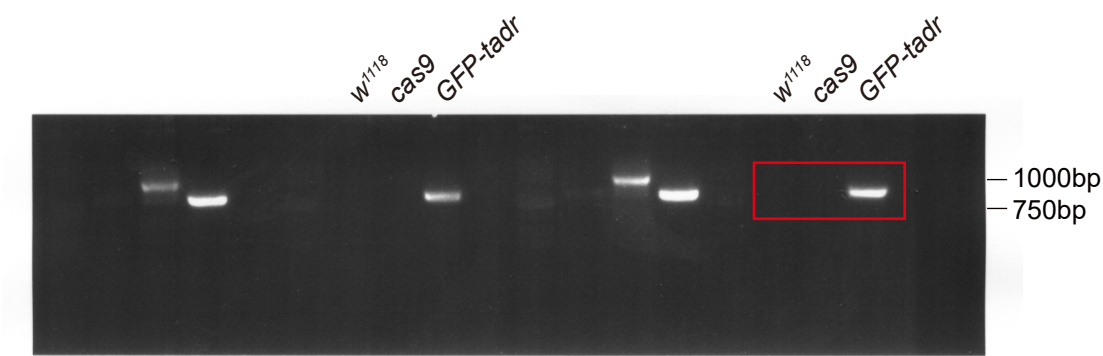

Supplement: supp [file elife-75821-supp-v1.zip › elife_poa_e75821_Figure_4_figure_supplement_1_source_data_1.pdf]

Figure 1-figure supplement 1

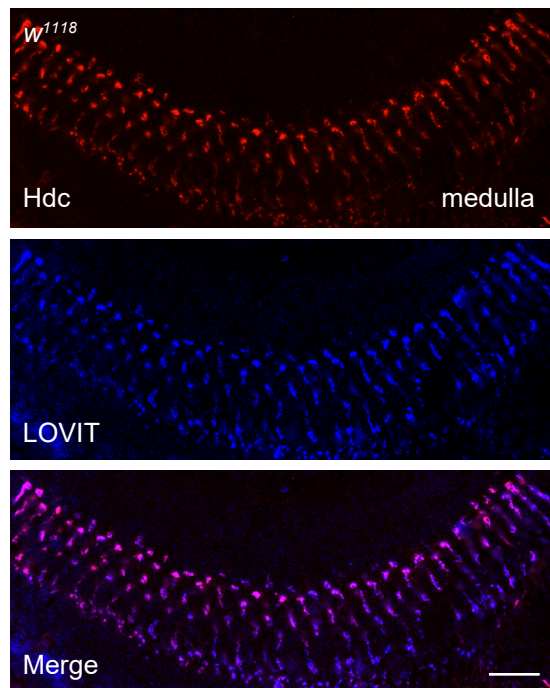

Supplement: supp [file elife-75821-supp-v1.zip › elife_poa_e75821_Figure_1_figure_supplement_1.pdf]

Figure 2-figure supplement 1

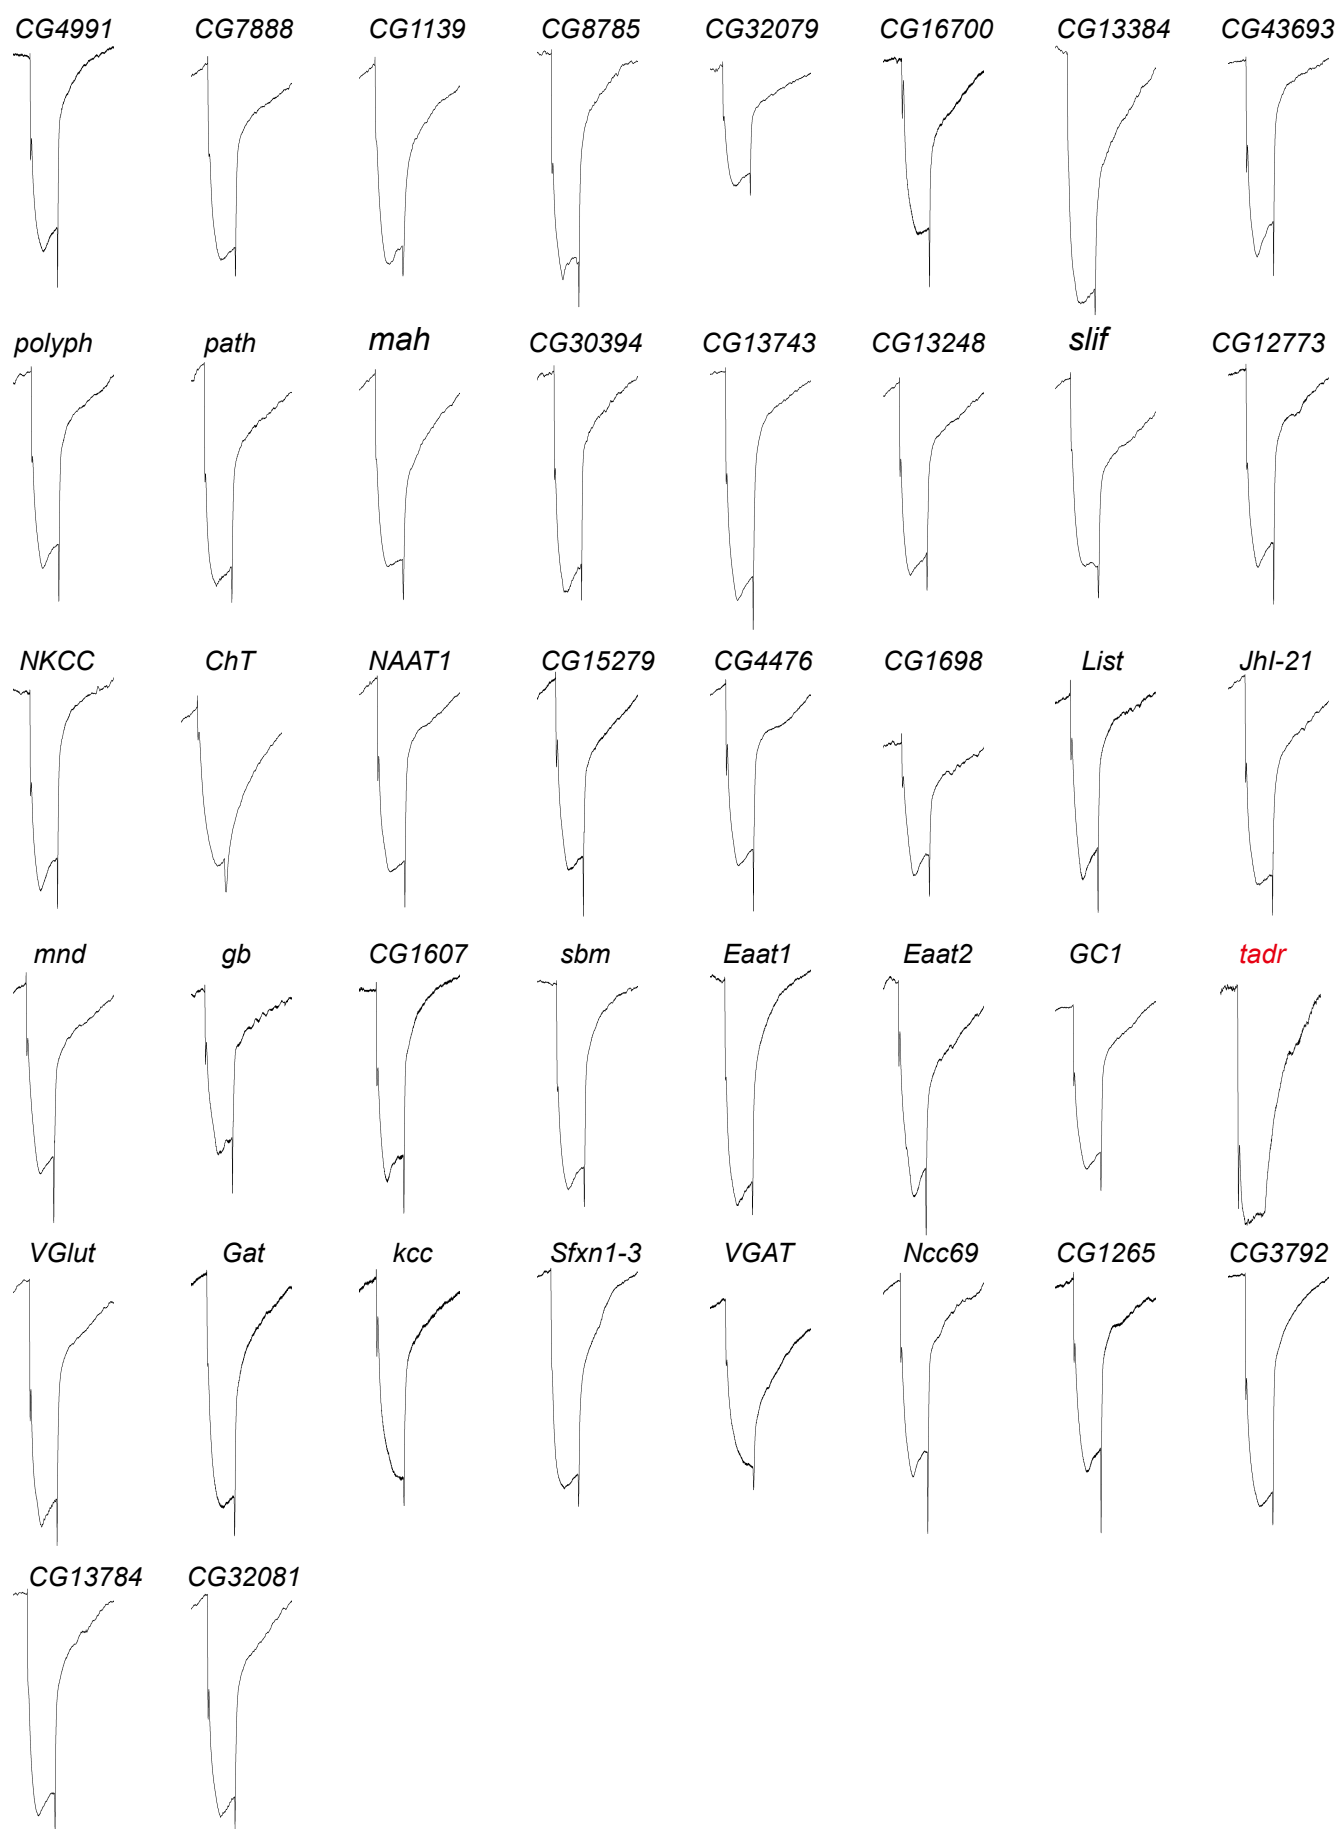

Supplement: supp [file elife-75821-supp-v1.zip › elife_poa_e75821_Figure_2_figure_supplement_1.pdf]

Figure 2-figure supplement 2

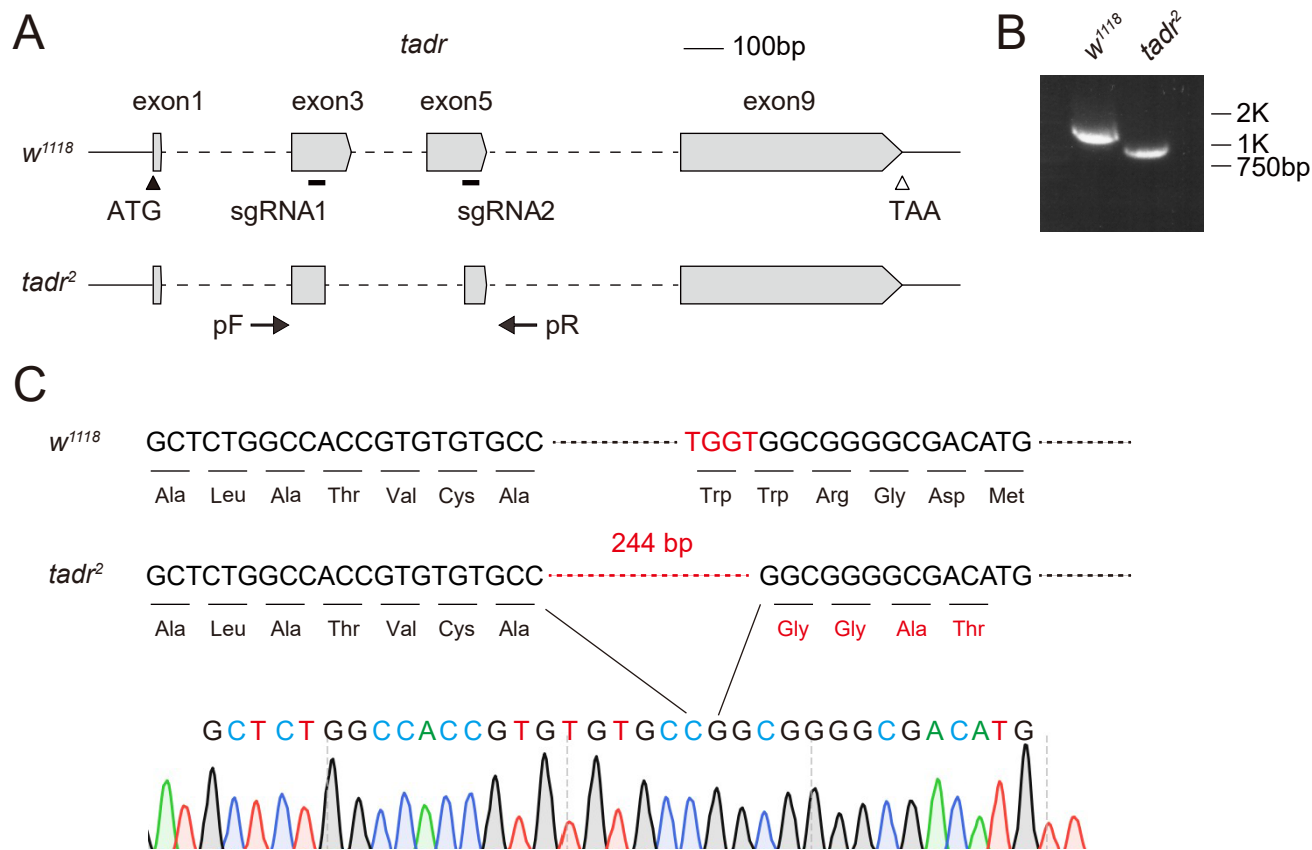

Supplement: supp [file elife-75821-supp-v1.zip › elife_poa_e75821_Figure_2_figure_supplement_2.pdf]

Figure 2-figure supplement 3

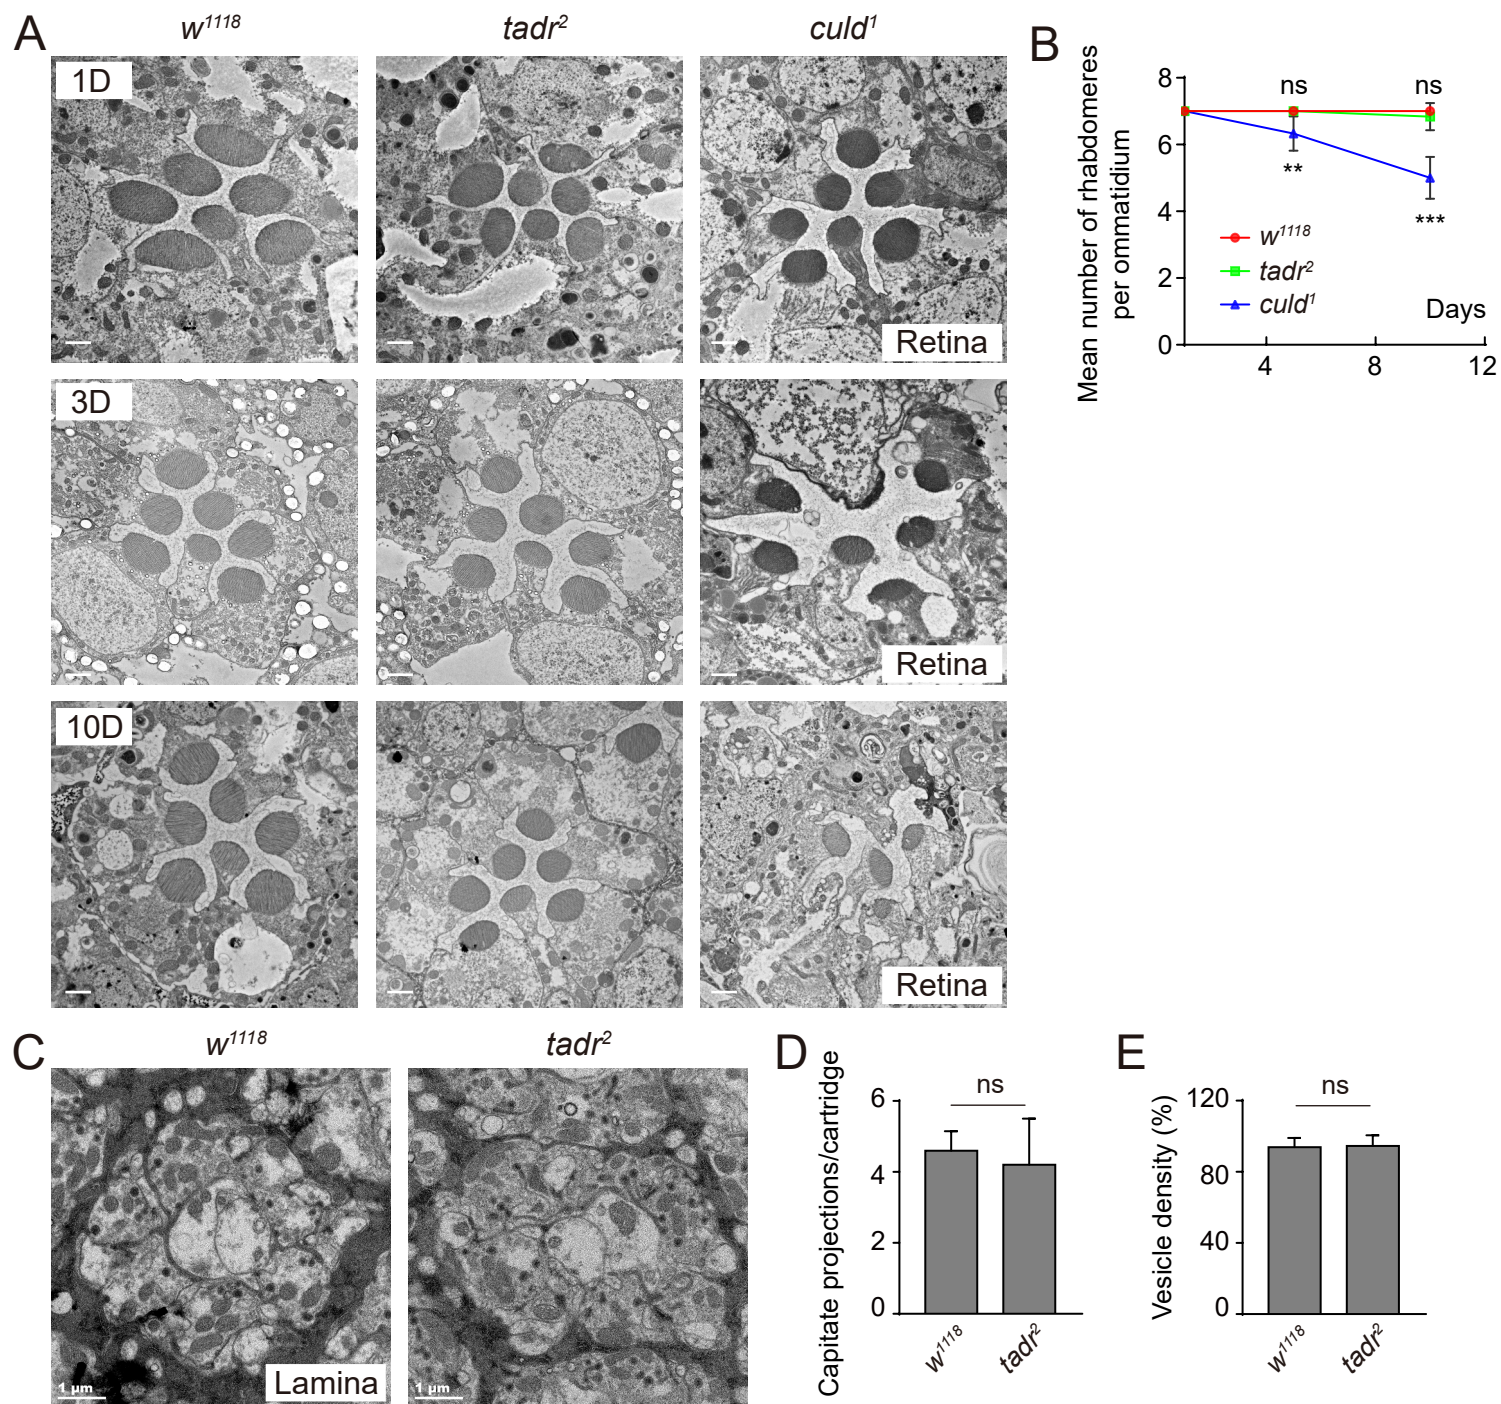

Supplement: supp [file elife-75821-supp-v1.zip › elife_poa_e75821_Figure_2_figure_supplement_3.pdf]

Figure 3-figure supplement 1

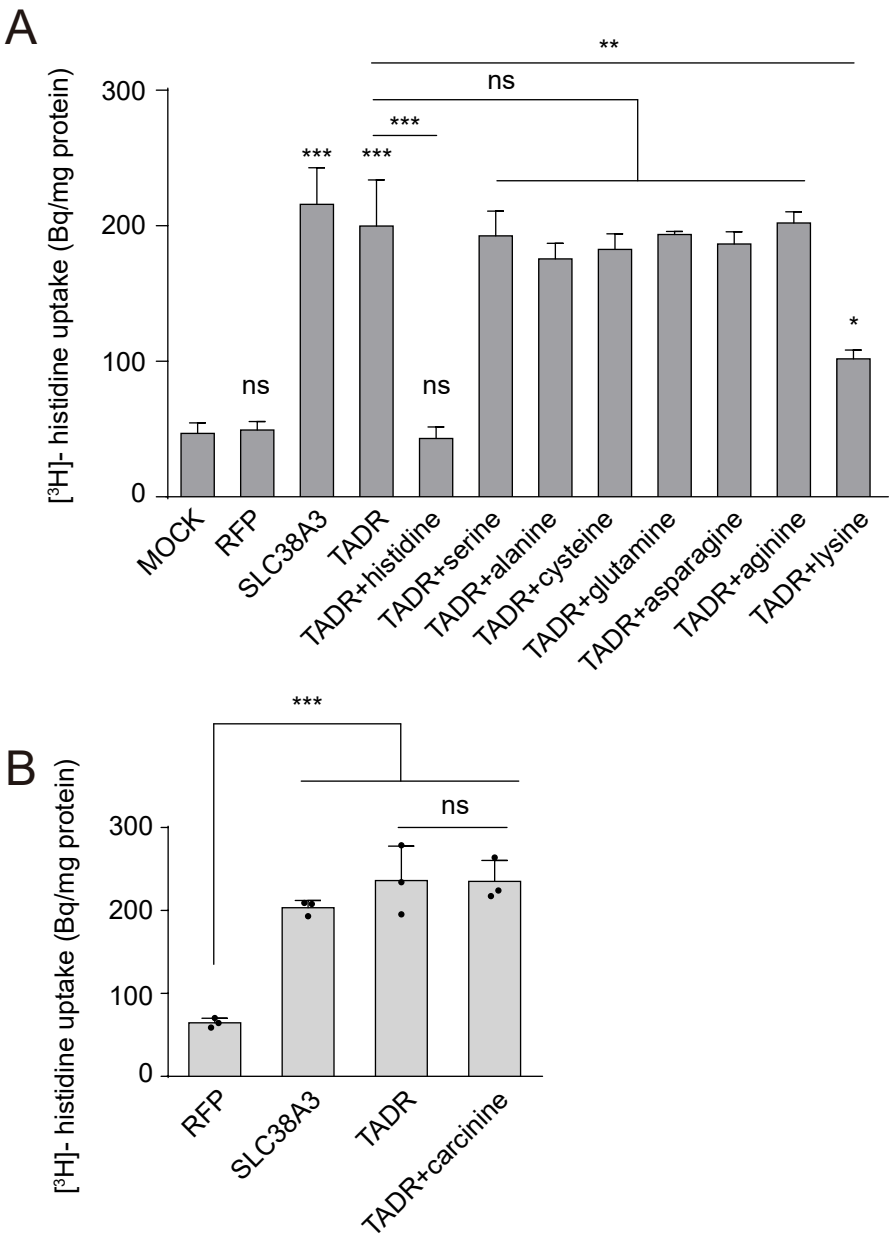

Supplement: supp [file elife-75821-supp-v1.zip › elife_poa_e75821_Figure_3_figure_supplement_1.pdf]

Figure 4-figure supplement 1

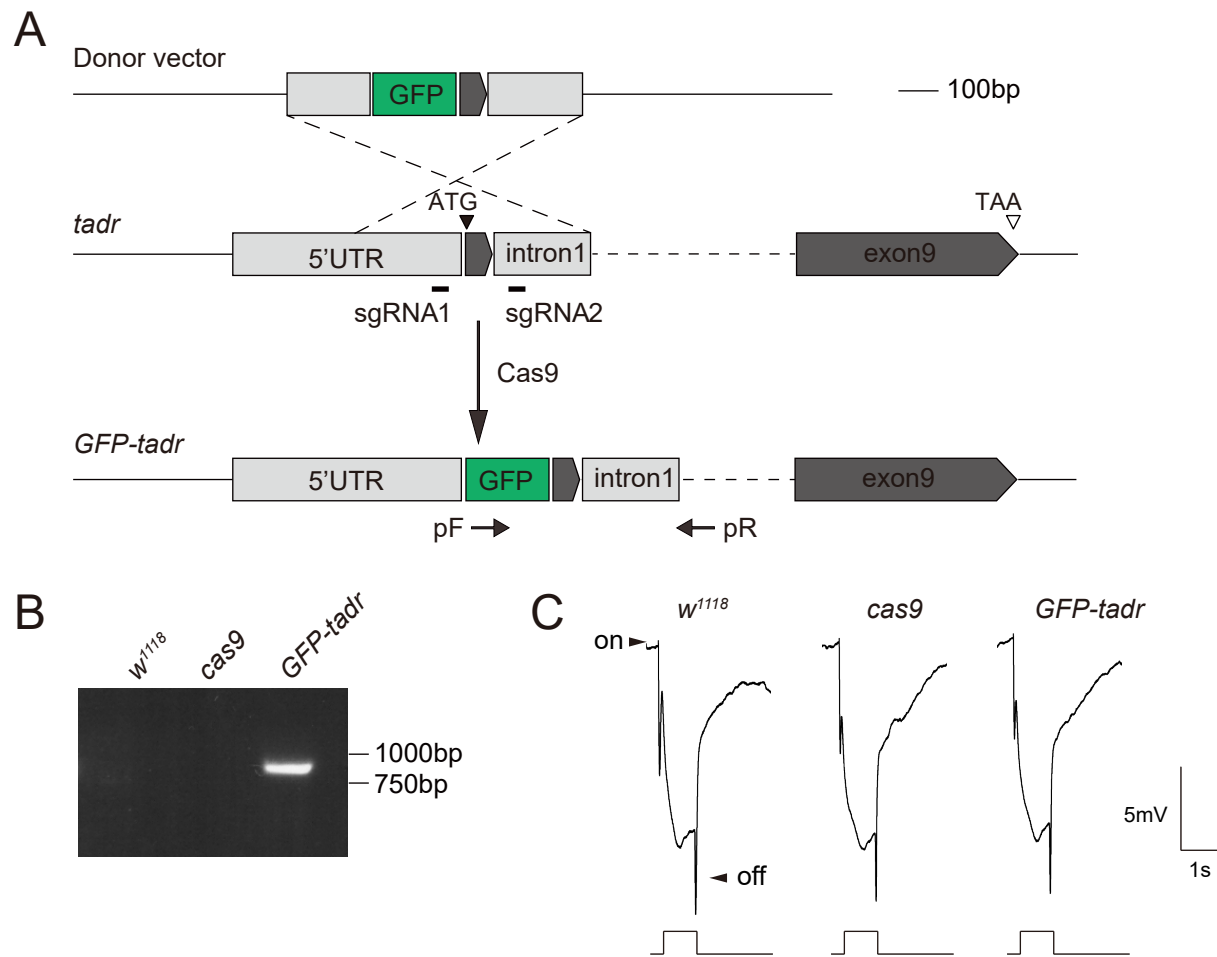

Supplement: supp [file elife-75821-supp-v1.zip › elife_poa_e75821_Figure_4_figure_supplement_1.pdf]

Figure 6-figure supplement 1

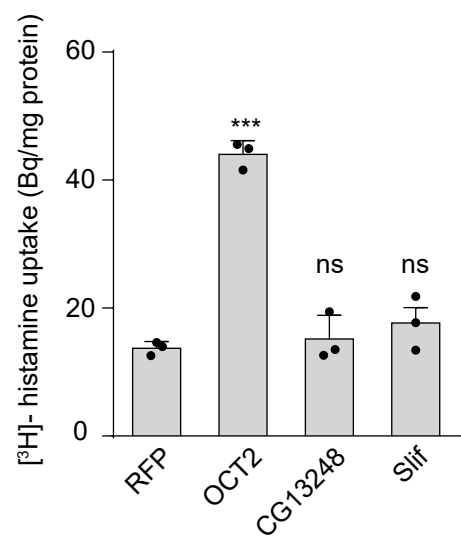

Supplement: supp [file elife-75821-supp-v1.zip › elife_poa_e75821_Figure_6_figure_supplement_1.pdf]
